# Supplementary material for: Data-driven comorbidity analysis of 100 common disorders reveals patient subgroups with differing mortality risks and laboratory correlates
Source: PubMed Central journal article supplement (PMC9630271; doi:10.1038/s41598-022-23090-3), 2022-11-02
Supplement: 41598_2022_23090_MOESM1_ESM.pdf [file 41598_2022_23090_MOESM1_ESM.pdf]

Supplementary Table 1. 100 most common diagnoses.

| Rank | Code | Description                                                          | Patients | Women |                  |                  | Men              |                  |                  |                  |
|------|------|----------------------------------------------------------------------|----------|-------|------------------|------------------|------------------|------------------|------------------|------------------|
|      |      |                                                                      |          | %     | Age, percentiles |                  |                  |                  |                  |                  |
|      |      |                                                                      |          |       | 25 <sup>th</sup> | 50 <sup>th</sup> | 75 <sup>th</sup> | 25 <sup>th</sup> | 50 <sup>th</sup> | 75 <sup>th</sup> |
| 1    | I10  | Essential (primary) hypertension                                     | 87,273   | 53    | 60               | 69               | 79               | 56               | 65               | 74               |
| 2    | J06  | Acute upper respiratory infections at multiple and unspecified sites | 70,515   | 52    | 2                | 8                | 35               | 1                | 4                | 18               |
| 3    | M54  | Dorsalgia                                                            | 66,696   | 59    | 34               | 48               | 62               | 35               | 48               | 61               |
| 4    | J18  | Pneumonia, organism unspecified                                      | 61,383   | 47    | 37               | 63               | 78               | 41               | 64               | 76               |
| 5    | J45  | Asthma                                                               | 56,301   | 55    | 16               | 44               | 62               | 7                | 15               | 53               |
| 6    | H25  | Senile cataract                                                      | 55,387   | 62    | 68               | 75               | 80               | 66               | 73               | 79               |
| 7    | M79  | Other soft tissue disorders, not elsewhere classified                | 54,662   | 60    | 34               | 50               | 63               | 30               | 49               | 65               |
| 8    | F32  | Depressive episode                                                   | 54,168   | 63    | 16               | 19               | 37               | 17               | 25               | 45               |
| 9    | I48  | Atrial fibrillation and flutter                                      | 54,048   | 45    | 67               | 75               | 82               | 59               | 68               | 76               |
| 10   | M17  | Gonarthrosis [arthrosis of knee]                                     | 44,729   | 63    | 59               | 67               | 75               | 56               | 65               | 72               |
| 11   | H66  | Suppurative and unspecified otitis media                             | 43,433   | 47    | 2                | 4                | 16               | 1                | 3                | 7                |
| 12   | H90  | Conductive and sensorineural hearing loss                            | 43,345   | 54    | 34               | 59               | 73               | 19               | 58               | 72               |
| 13   | G47  | Sleep disorders                                                      | 42,894   | 34    | 49               | 58               | 66               | 46               | 55               | 64               |
| 14   | I25  | Chronic ischemic heart disease                                       | 42,746   | 36    | 66               | 75               | 82               | 62               | 70               | 77               |
| 15   | A09  | Diarrhea and gastroenteritis of presumed infectious origin           | 40,501   | 54    | 6                | 32               | 65               | 3                | 23               | 55               |
| 16   | F41  | Other anxiety disorders                                              | 36,647   | 66    | 16               | 21               | 35               | 17               | 25               | 40               |
| 17   | E11  | Non-insulin-dependent diabetes mellitus                              | 36,537   | 42    | 59               | 68               | 76               | 58               | 66               | 72               |
| 18   | N39  | Other disorders of urinary system                                    | 36,471   | 81    | 43               | 61               | 74               | 58               | 70               | 77               |
| 19   | M25  | Other joint disorders, not elsewhere classified                      | 35,719   | 60    | 27               | 42               | 56               | 26               | 41               | 54               |
| 20   | K57  | Diverticular disease of intestine                                    | 33,404   | 59    | 58               | 67               | 76               | 53               | 64               | 73               |
| 21   | M51  | Other intervertebral disc disorders                                  | 33,299   | 54    | 38               | 48               | 59               | 38               | 48               | 57               |
| 22   | I50  | Heart failure                                                        | 30,504   | 49    | 72               | 80               | 86               | 64               | 73               | 80               |
| 23   | L20  | Atopic dermatitis                                                    | 30,063   | 54    | 5                | 21               | 39               | 2                | 8                | 30               |
| 24   | N10  | Acute tubulo-interstitial nephritis                                  | 30,058   | 64    | 19               | 54               | 76               | 48               | 66               | 77               |
| 25   | K80  | Cholelithiasis                                                       | 29,707   | 65    | 42               | 57               | 70               | 49               | 63               | 74               |
| 26   | I63  | Cerebral infarction                                                  | 29,281   | 47    | 60               | 72               | 81               | 55               | 66               | 75               |
| 27   | M75  | Shoulder lesions                                                     | 28,915   | 53    | 47               | 54               | 61               | 47               | 55               | 62               |
| 28   | K40  | Inguinal hernia                                                      | 28,275   | 14    | 35               | 63               | 76               | 46               | 62               | 72               |
| 29   | F33  | Recurrent depressive disorder                                        | 28,011   | 68    | 28               | 39               | 51               | 29               | 41               | 52               |
| 30   | F10  | Mental and behavioral disorders due to use of alcohol                | 26,849   | 33    | 25               | 42               | 55               | 35               | 47               | 57               |
| 31   | E78  | Disorders of lipoprotein metabolism and other lipidemias             | 26,712   | 46    | 56               | 66               | 75               | 52               | 62               | 71               |
| 32   | I49  | Other cardiac arrhythmias                                            | 26,429   | 57    | 45               | 66               | 78               | 46               | 65               | 75               |
| 33   | H35  | Other retinal disorders                                              | 26,041   | 58    | 67               | 76               | 83               | 60               | 72               | 80               |
| 34   | N30  | Cystitis                                                             | 25,769   | 84    | 28               | 59               | 78               | 55               | 69               | 79               |
| 35   | L30  | Other dermatitis                                                     | 24,901   | 58    | 35               | 54               | 66               | 40               | 57               | 68               |
| 36   | M16  | Coxarthrosis [arthrosis of hip]                                      | 24,837   | 59    | 61               | 69               | 76               | 57               | 66               | 73               |
| 37   | M23  | Internal derangement of knee                                         | 24,772   | 50    | 35               | 48               | 58               | 32               | 44               | 53               |

|    |     |                                                                          |        |     |    |    |    |    |    |    |
|----|-----|--------------------------------------------------------------------------|--------|-----|----|----|----|----|----|----|
| 38 | C44 | Other malignant neoplasms of skin                                        | 24,210 | 54  | 68 | 76 | 84 | 68 | 76 | 82 |
| 39 | J35 | Chronic diseases of tonsils and adenoids                                 | 24,004 | 54  | 7  | 18 | 30 | 4  | 8  | 23 |
| 40 | E66 | Obesity                                                                  | 23,852 | 60  | 33 | 45 | 54 | 18 | 47 | 57 |
| 41 | N40 | Hyperplasia of prostate                                                  | 23,820 | 0   |    |    |    | 65 | 71 | 77 |
| 42 | C50 | Malignant neoplasm of breast                                             | 23,475 | 99  | 52 | 62 | 69 | 60 | 68 | 75 |
| 43 | I21 | Acute myocardial infarction                                              | 23,472 | 37  | 66 | 75 | 82 | 58 | 66 | 75 |
| 44 | N92 | Excessive, frequent, or irregular menstruation                           | 23,435 | 100 | 37 | 44 | 48 |    |    |    |
| 45 | A49 | Bacterial infection of unspecified site                                  | 23,392 | 49  | 51 | 66 | 77 | 52 | 66 | 75 |
| 46 | I87 | Other disorders of veins                                                 | 23,133 | 70  | 44 | 55 | 67 | 48 | 58 | 69 |
| 47 | J20 | Acute bronchitis                                                         | 22,790 | 52  | 25 | 52 | 70 | 5  | 45 | 69 |
| 48 | H53 | Visual disturbances                                                      | 22,735 | 59  | 25 | 48 | 66 | 15 | 45 | 64 |
| 49 | I70 | Atherosclerosis                                                          | 22,531 | 44  | 68 | 76 | 84 | 64 | 71 | 78 |
| 50 | G56 | Mononeuropathies of upper limb                                           | 22,342 | 65  | 44 | 54 | 64 | 45 | 55 | 64 |
| 51 | G43 | Migraine                                                                 | 22,164 | 74  | 21 | 34 | 47 | 12 | 18 | 41 |
| 52 | H10 | Conjunctivitis                                                           | 22,084 | 55  | 10 | 32 | 53 | 5  | 18 | 46 |
| 53 | J30 | Vasomotor and allergic rhinitis                                          | 22,051 | 49  | 13 | 24 | 38 | 10 | 14 | 30 |
| 54 | I84 | Hemorrhoids                                                              | 21,713 | 56  | 43 | 55 | 68 | 41 | 52 | 64 |
| 55 | K59 | Other functional intestinal disorders                                    | 21,174 | 57  | 6  | 25 | 63 | 5  | 9  | 48 |
| 56 | K35 | Acute appendicitis                                                       | 20,937 | 49  | 25 | 38 | 57 | 24 | 36 | 52 |
| 57 | H40 | Glaucoma                                                                 | 20,809 | 61  | 61 | 71 | 79 | 55 | 68 | 76 |
| 58 | D12 | Benign neoplasm of colon, rectum, anus, or anal canal                    | 20,761 | 50  | 58 | 67 | 75 | 59 | 68 | 75 |
| 59 | M47 | Spondylosis                                                              | 20,670 | 57  | 54 | 63 | 72 | 51 | 59 | 68 |
| 60 | J15 | Bacterial pneumonia, not elsewhere classified                            | 20,430 | 46  | 46 | 63 | 76 | 48 | 64 | 75 |
| 61 | F43 | Reaction to severe stress, and adjustment disorders                      | 20,417 | 62  | 16 | 22 | 39 | 13 | 18 | 39 |
| 62 | A46 | Erysipelas                                                               | 20,414 | 43  | 53 | 66 | 78 | 47 | 59 | 69 |
| 63 | I20 | Angina pectoris                                                          | 20,211 | 39  | 64 | 73 | 80 | 60 | 68 | 76 |
| 64 | J03 | Acute tonsillitis                                                        | 19,895 | 54  | 9  | 19 | 29 | 5  | 17 | 27 |
| 65 | K21 | Gastro-esophageal reflux disease                                         | 19,791 | 52  | 25 | 52 | 66 | 10 | 48 | 63 |
| 66 | G45 | Transient cerebral ischemic attacks and related syndromes                | 19,441 | 54  | 62 | 71 | 80 | 58 | 68 | 77 |
| 67 | H65 | Nonsuppurative otitis media                                              | 19,164 | 44  | 3  | 6  | 39 | 2  | 5  | 12 |
| 68 | G40 | Epilepsy                                                                 | 19,037 | 50  | 12 | 29 | 51 | 10 | 27 | 52 |
| 69 | N83 | Noninflammatory disorders of ovary, fallopian tube and broad ligament    | 18,934 | 100 | 33 | 45 | 59 | 21 | 26 | 26 |
| 70 | J44 | Other chronic obstructive pulmonary disease                              | 18,900 | 40  | 62 | 69 | 75 | 63 | 69 | 76 |
| 71 | M19 | Other arthrosis                                                          | 18,900 | 58  | 53 | 60 | 70 | 48 | 57 | 65 |
| 72 | M48 | Other spondylopathies                                                    | 18,813 | 57  | 61 | 70 | 77 | 57 | 66 | 74 |
| 73 | D25 | Leiomyoma of uterus                                                      | 18,548 | 100 | 41 | 47 | 52 | 30 | 43 | 43 |
| 74 | G44 | Other headache syndromes                                                 | 18,317 | 70  | 29 | 42 | 56 | 31 | 43 | 55 |
| 75 | C61 | Malignant neoplasm of prostate                                           | 18,133 | 0   |    |    |    | 65 | 71 | 77 |
| 76 | J31 | Chronic rhinitis, nasopharyngitis and pharyngitis                        | 18,089 | 53  | 30 | 45 | 58 | 26 | 42 | 56 |
| 77 | D48 | Neoplasm of uncertain or unknown behavior of other and unspecified sites | 17,686 | 56  | 40 | 57 | 71 | 39 | 58 | 71 |

|            |     |                                                               |        |     |    |    |    |    |    |    |
|------------|-----|---------------------------------------------------------------|--------|-----|----|----|----|----|----|----|
| <b>78</b>  | H43 | Disorders of vitreous body                                    | 17,512 | 63  | 56 | 64 | 70 | 56 | 64 | 70 |
| <b>79</b>  | J21 | Acute bronchiolitis                                           | 17,457 | 39  | 0  | 1  | 2  | 0  | 1  | 2  |
| <b>80</b>  | J01 | Acute sinusitis                                               | 17,097 | 64  | 30 | 42 | 58 | 23 | 41 | 58 |
| <b>81</b>  | L57 | Skin changes due to chronic exposure to nonionizing radiation | 16,400 | 57  | 70 | 77 | 84 | 71 | 77 | 83 |
| <b>82</b>  | M20 | Acquired deformities of fingers and toes                      | 16,345 | 80  | 52 | 60 | 68 | 52 | 60 | 68 |
| <b>83</b>  | H26 | Other cataract                                                | 16,206 | 67  | 62 | 75 | 82 | 47 | 64 | 77 |
| <b>84</b>  | K92 | Other digestive system diseases                               | 15,873 | 42  | 53 | 71 | 83 | 50 | 64 | 76 |
| <b>85</b>  | H04 | Disorders of lacrimal system                                  | 15,462 | 70  | 41 | 57 | 70 | 32 | 51 | 67 |
| <b>86</b>  | J32 | Chronic sinusitis                                             | 15,091 | 63  | 36 | 48 | 60 | 35 | 48 | 61 |
| <b>87</b>  | I35 | Nonrheumatic aortic valve disorders                           | 15,026 | 45  | 69 | 78 | 83 | 60 | 71 | 78 |
| <b>88</b>  | K02 | Dental caries                                                 | 14,736 | 43  | 16 | 45 | 64 | 18 | 48 | 64 |
| <b>89</b>  | N81 | Female genital prolapse                                       | 14,566 | 100 | 57 | 68 | 76 |    |    |    |
| <b>90</b>  | L50 | Urticaria                                                     | 14,361 | 62  | 22 | 39 | 53 | 8  | 27 | 49 |
| <b>91</b>  | K29 | Gastritis and duodenitis                                      | 14,307 | 52  | 51 | 64 | 75 | 52 | 64 | 73 |
| <b>92</b>  | H02 | Other disorders of eyelid                                     | 14,099 | 61  | 58 | 67 | 77 | 59 | 68 | 76 |
| <b>93</b>  | N97 | Female infertility                                            | 13,884 | 100 | 30 | 33 | 36 | 31 | 31 | 33 |
| <b>94</b>  | H33 | Retinal detachments and breaks                                | 13,666 | 47  | 52 | 60 | 68 | 52 | 61 | 68 |
| <b>95</b>  | L02 | Cutaneous abscess, furuncle and carbuncle                     | 13,612 | 44  | 26 | 41 | 59 | 27 | 42 | 57 |
| <b>96</b>  | I80 | Phlebitis and thrombophlebitis                                | 13,604 | 57  | 42 | 59 | 72 | 45 | 57 | 69 |
| <b>97</b>  | A41 | Other septicemia                                              | 13,570 | 48  | 38 | 61 | 74 | 40 | 60 | 71 |
| <b>98</b>  | D64 | Other anemias                                                 | 13,544 | 52  | 45 | 67 | 79 | 54 | 68 | 77 |
| <b>99</b>  | N84 | Polyp of female genital tract                                 | 13,487 | 100 | 43 | 54 | 65 |    |    |    |
| <b>100</b> | E10 | Insulin-dependent diabetes mellitus                           | 13,443 | 44  | 14 | 28 | 48 | 14 | 30 | 51 |

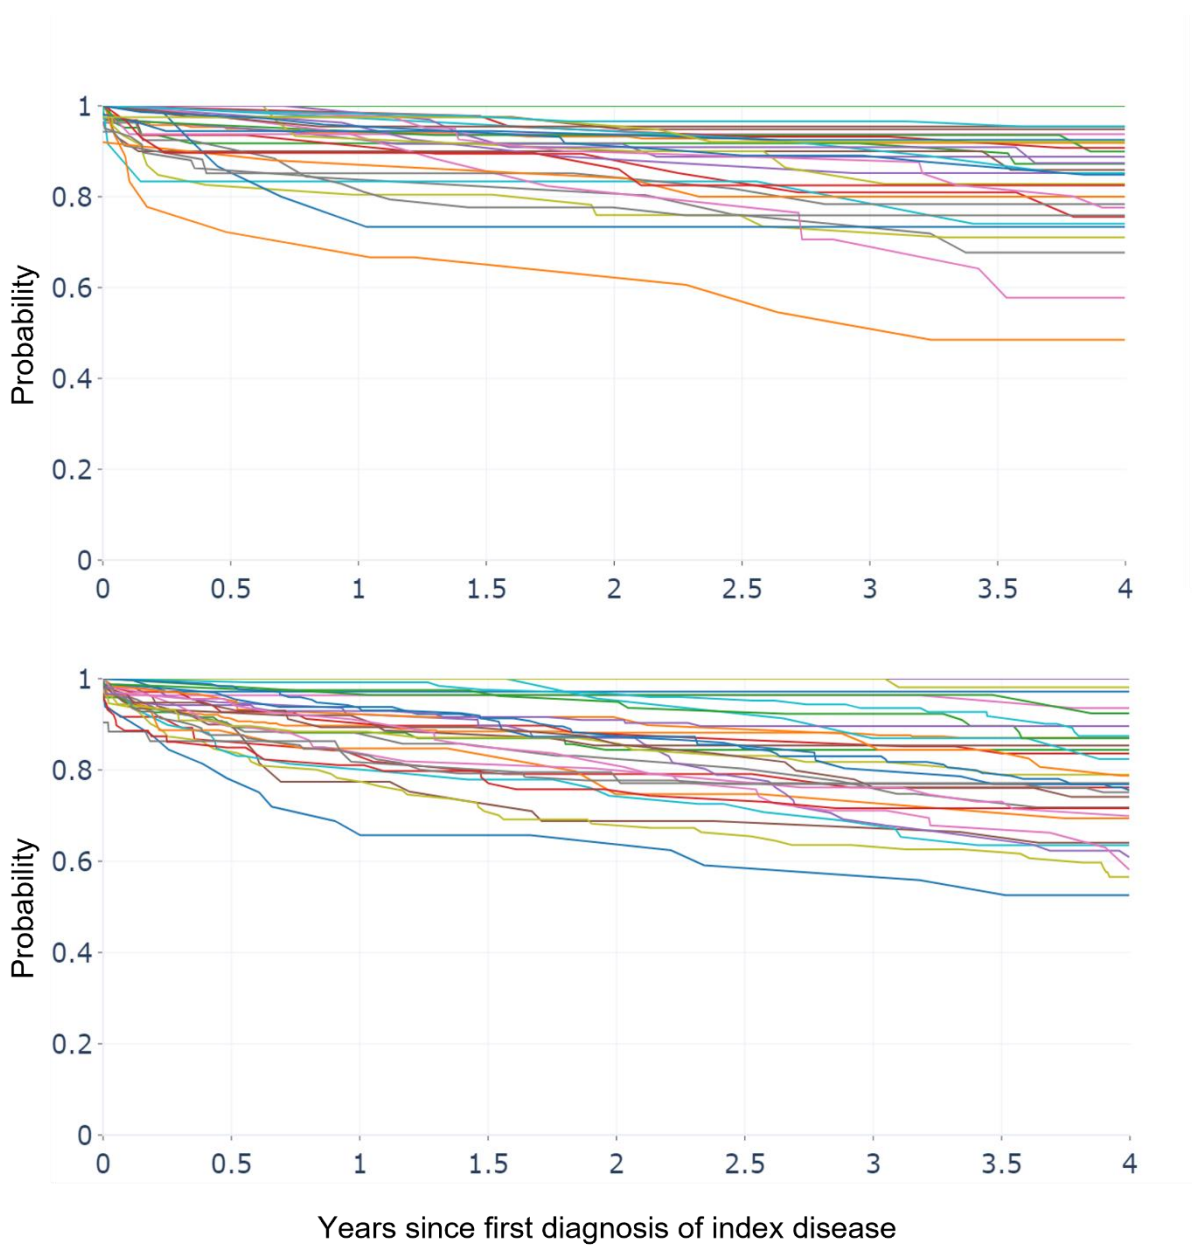

Supplementary Fig. 1. Atrial fibrillation. Cluster-specific Kaplan-Meier survival for 60- to 69-year-old women (upper) and men (lower).

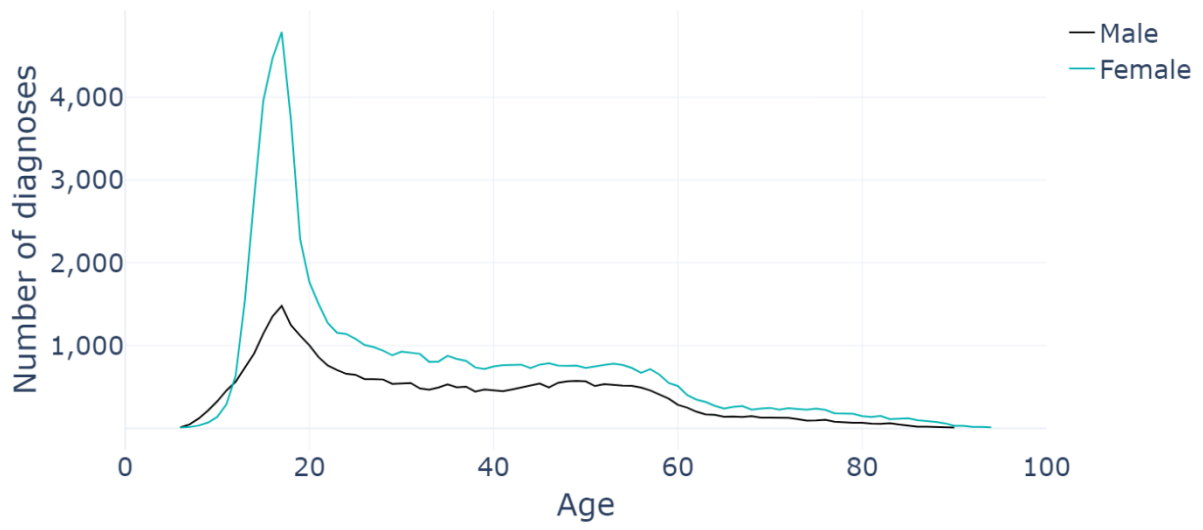

Supplementary Fig. 2. Number of depressive episode (F32) diagnoses by age.
